# Supplementary material
Source: Springer Nature journal article supplement (https://www.springermedizin.de/resource/supplementary/12882_2011_238_MOESM1_ESM.pdf/9453346)

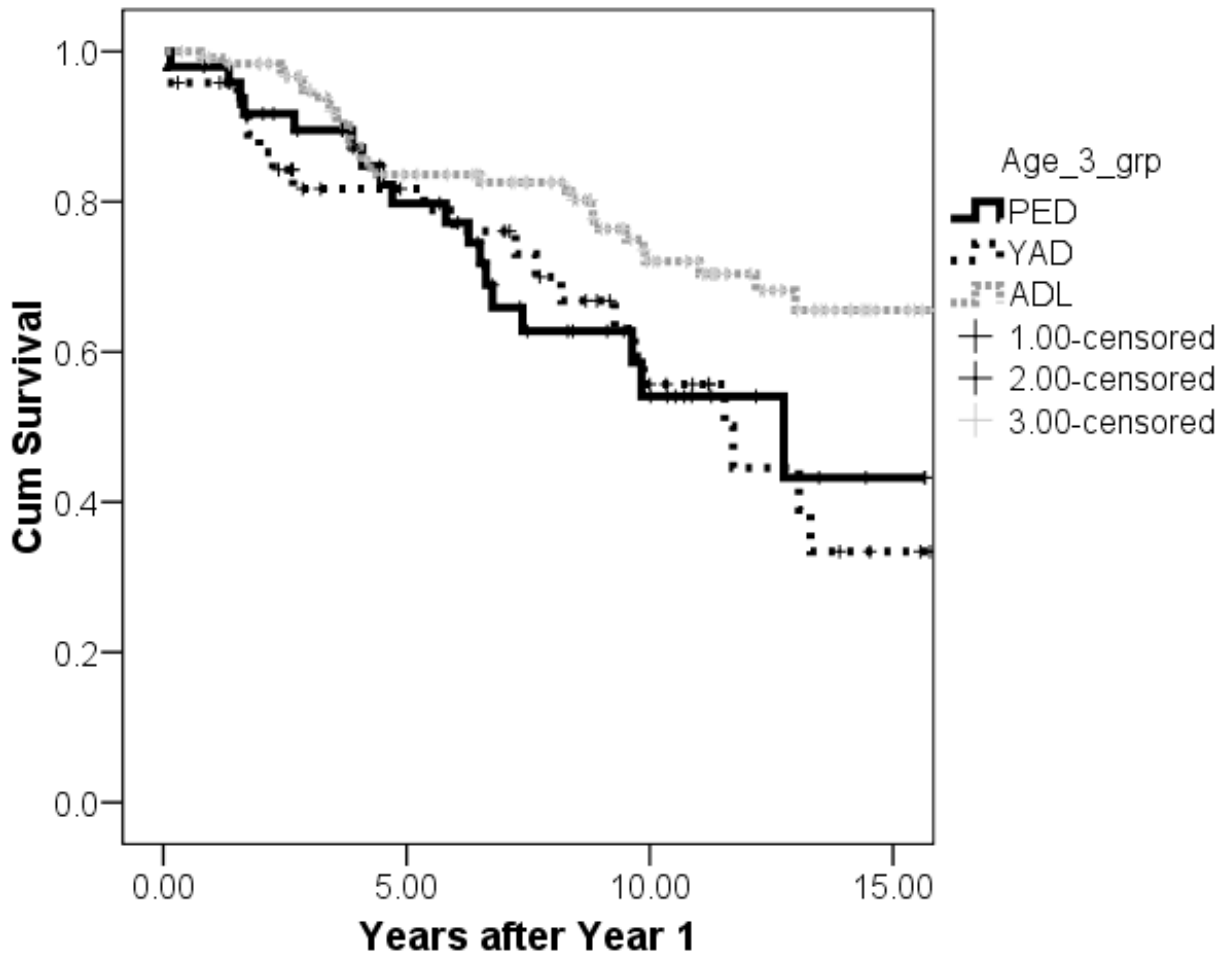

Numbers at Risk

|     |     |    |    |    |
|-----|-----|----|----|----|
| PED | 49  | 32 | 12 | 2  |
| YAD | 48  | 29 | 14 | 5  |
| ADL | 125 | 86 | 48 | 13 |

Supplement: MOESM1 [file 9453346]
